# Supplementary material for: Chemical destaining and the delta correction for blue intensity measurements of stained lake subfossil trees
Source: Copernicus journal article supplement (doi:10.5194/bg-17-4559-2020), 2020-09-18
Supplement: Supplementary file 1 [file bg-17-4559-2020-supplement.pdf]

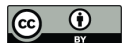

*Supplement of*

**Chemical destaining and the delta correction for blue intensity measurements of stained lake subfossil trees**

**Feng Wang et al.**

*Correspondence to:* Feng Wang (feng.wang@uqar.ca)

The copyright of individual parts of the supplement might differ from the CC BY 4.0 License.

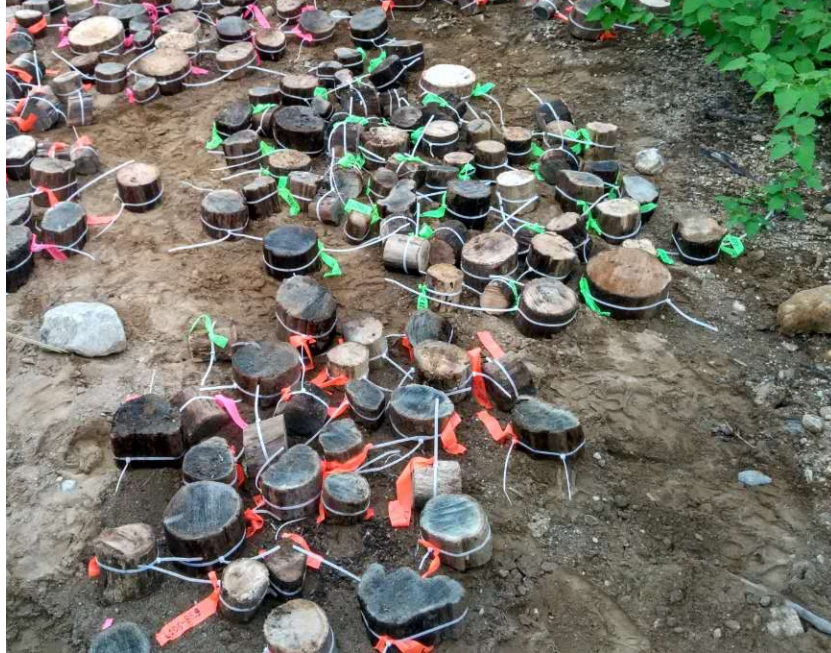

**Figure S1.** A general view of the staining issue of wet LSTs at the site L105. Note the blue-gray colors of many cross-sections sampled on lake subfossils.

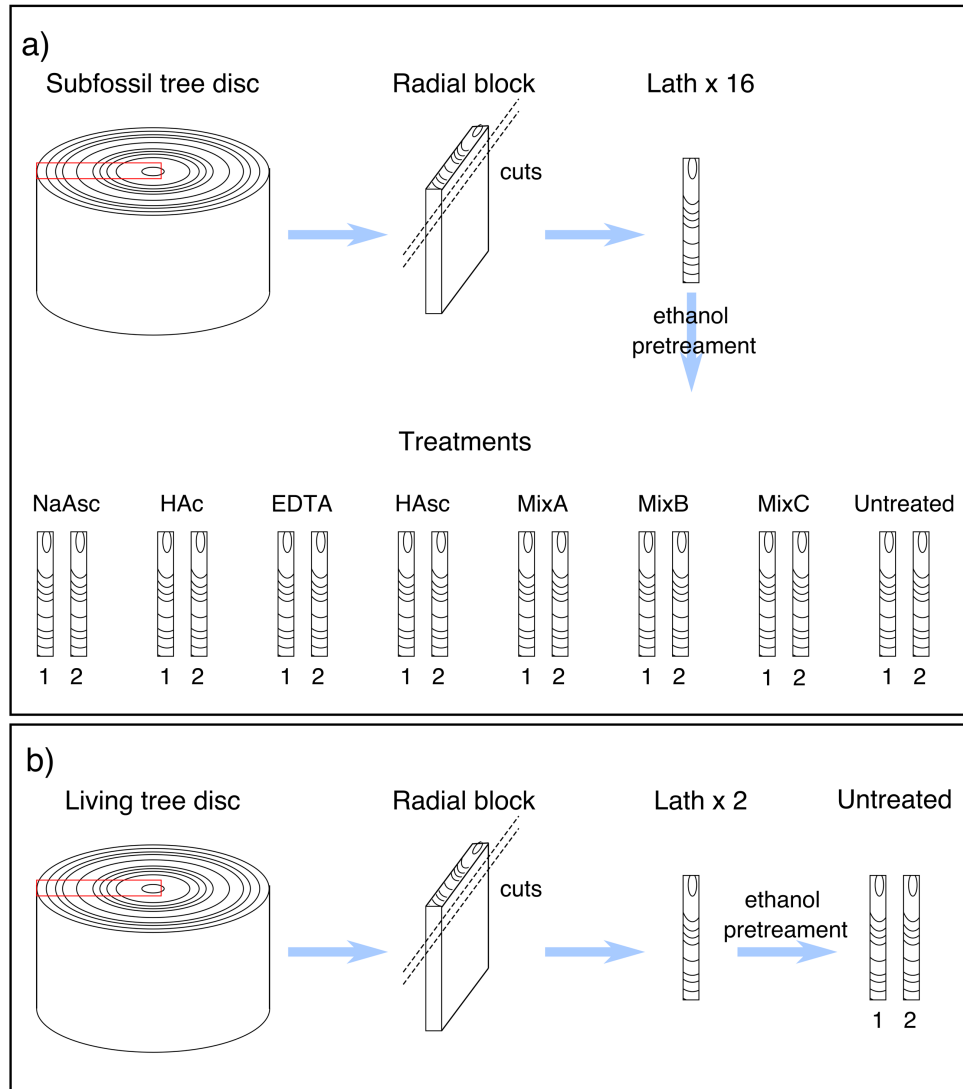

**Figure S2.** Design of de-staining experiments following Section 2.2 showing how a subfossil tree replicate (a) and a living-tree replicate (b) were cut into 1mm-thick laths and how these laths were treated using different chemical reagents. Lath 1 and 2 of each pair were used to analyze the residual Fe and wood RGB intensities, respectively. In total, ten subfossil tree replicates and ten living-tree replicates were processed following the corresponding procedure.

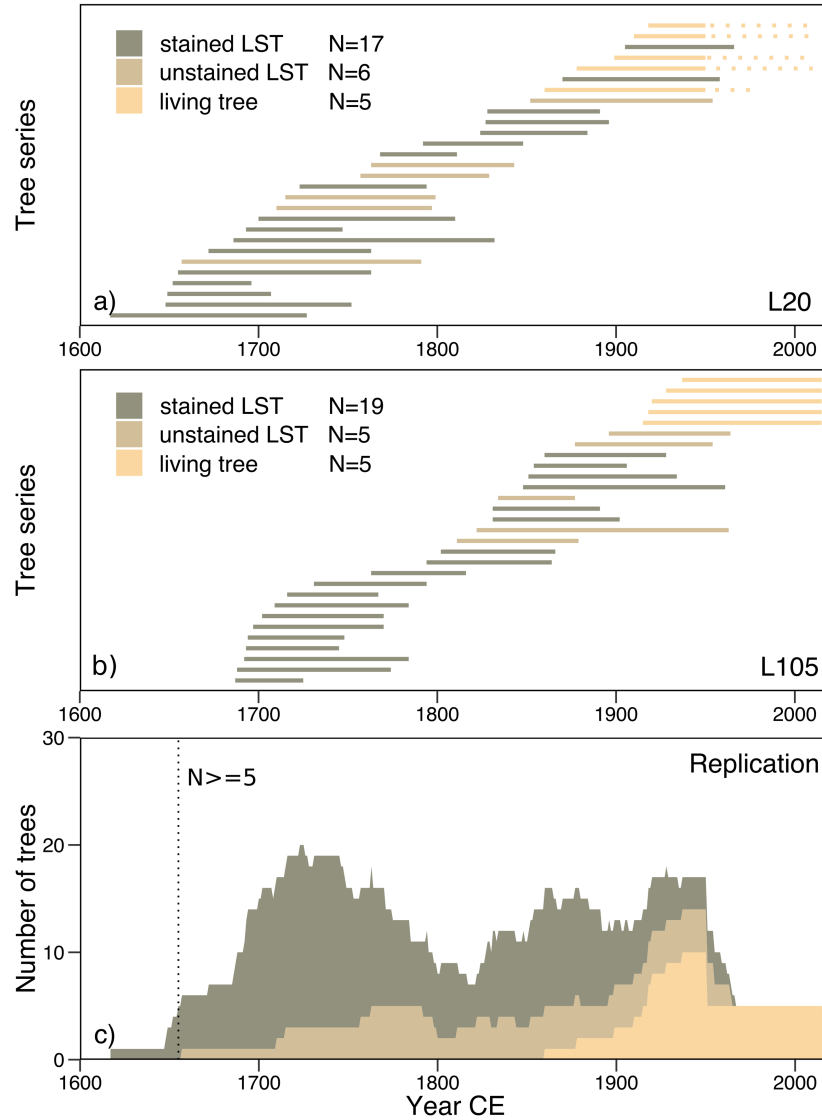

**Figure S3.** Timespans of tree-ring series used for developing LBI, DBI, and MXD chronologies (a–b), and tree replication of the regional chronology (c). Dotted lines in (a) denote the post-1950 period at L20, for which living-tree data were excluded due to the likely sapwood-heartwood color differences and unhealthy growth of trees. Note that LBI, DBI, and MXD series share the same timespans and chronologies share the same tree replication because we kept only tree rings with measured values for all the three parameters (i.e. LBI, DBI, and MXD).



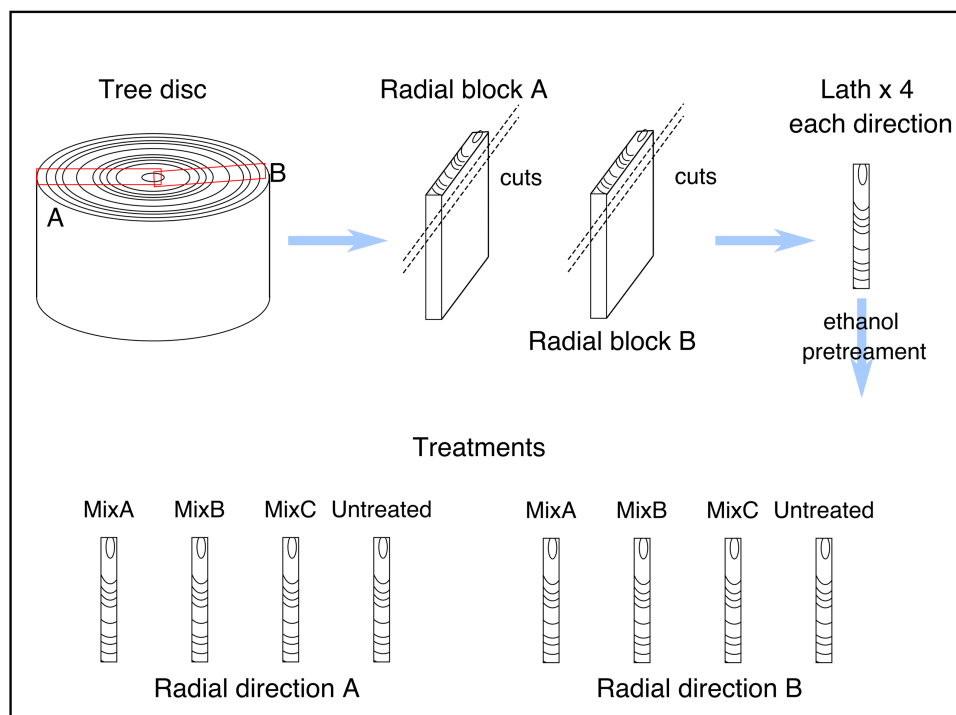

**Figure S4.** De-staining treatments of selected samples used for dendrochronological assessments following Section 2.3 showing how a tree replicate was cut into 1mm-thick laths and how these laths were treated using different chemical reagents. LBI, DBI, and MXD series were measured from each lath after treatments. In total, 57 tree samples from L20 and L105 were processed following this procedure.

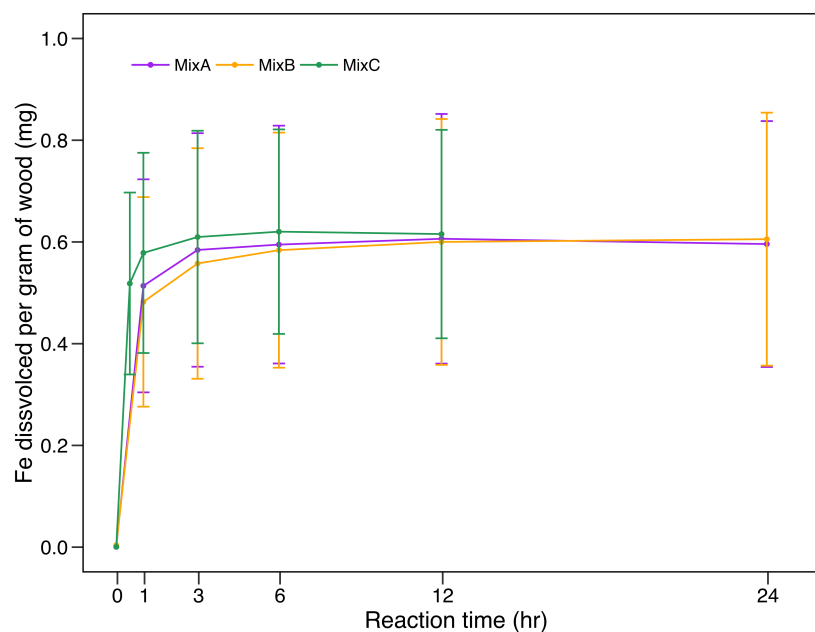

**Figure S5.** Fe dissolution curves during the MixA, MixB, and MixC treatments. Dots and error bars refer to the mean and standard deviation values, respectively. Note that the reaction curve of MixC was computed from data of 9 LST replicates (10 for MixA and MixB).

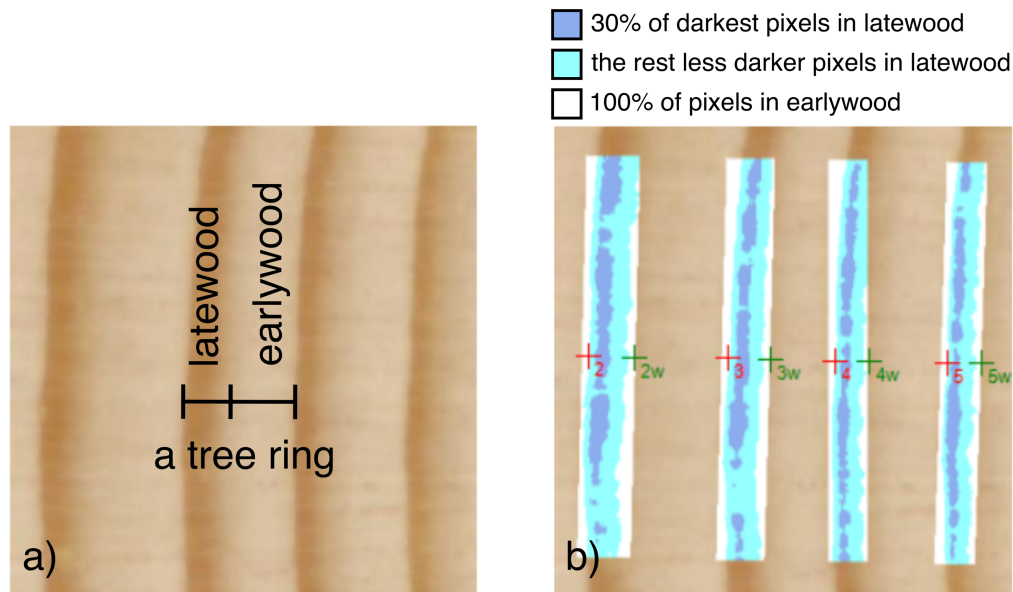

**Figure S6.** Tree-ring structure (a) and an example of tree-ring color intensity measurement using Coorecorder 8.1 (Cybis Dendrochronology) (b).

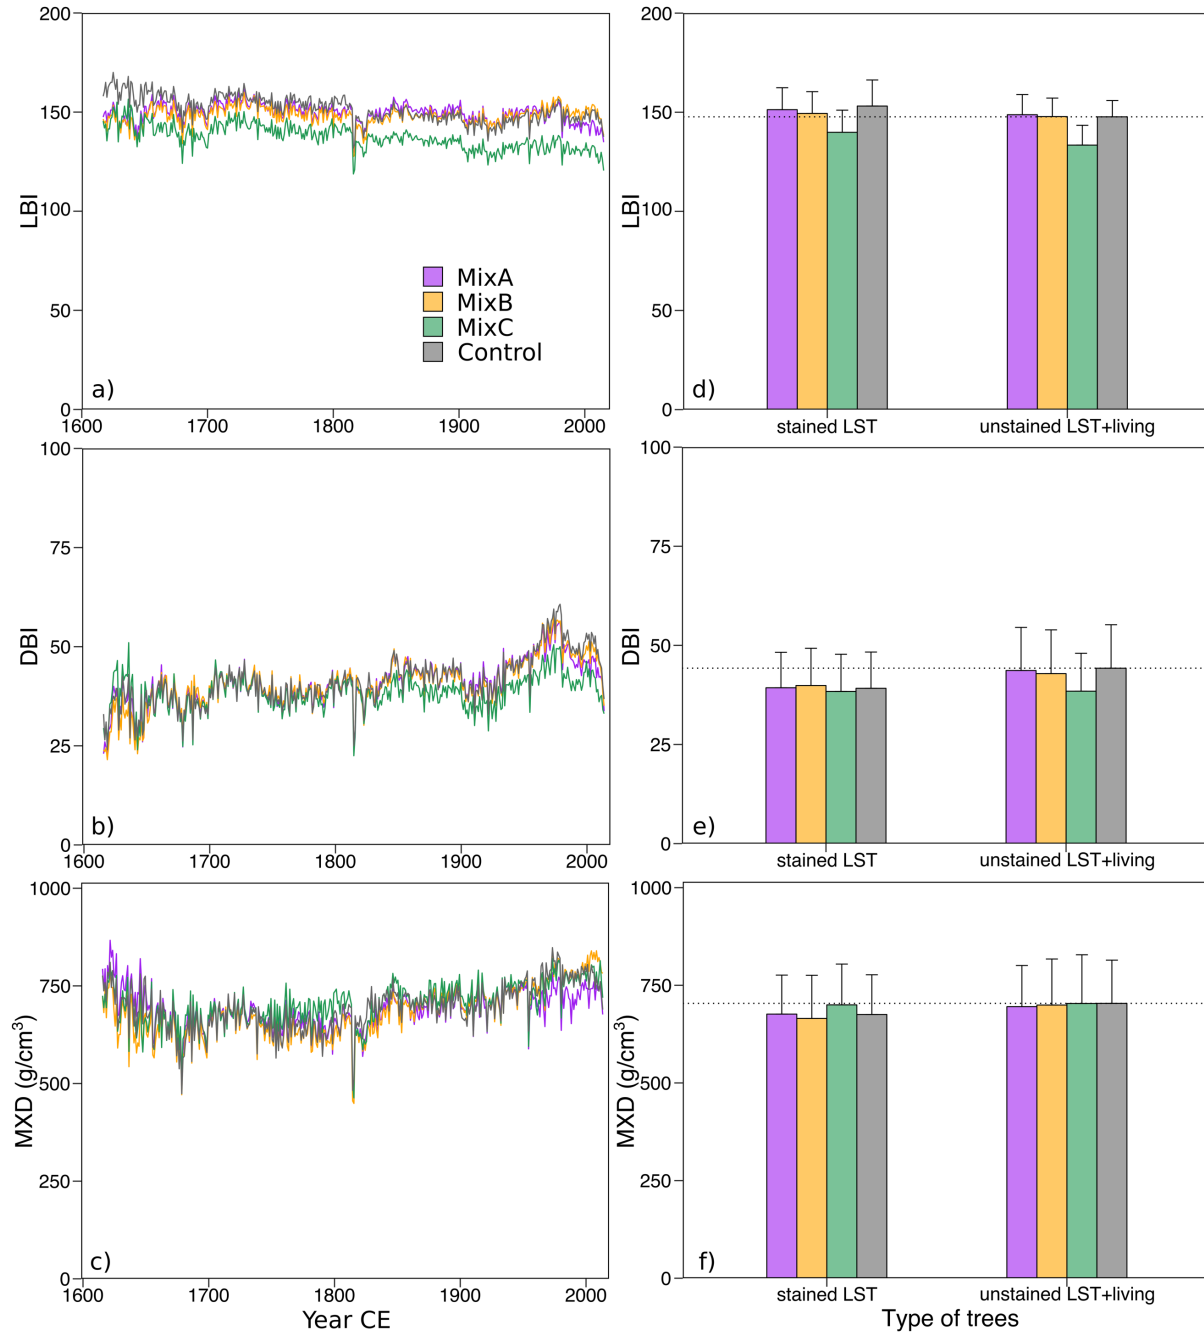

**Figure S7.** Raw data of LBI, DBI, and MXD of treated (MixA, MixB, MixC) and untreated (Control) LSTs and living trees. (a)–(c) show the averaged mean value of the series according to calendar years. (d)–(f) show the averaged data (bars) of stained LSTs and unstained LSTs+living trees, along with their standard deviations (error bars). Dotted horizontal lines denote the averaged data of untreated, unstained LSTs+living trees.

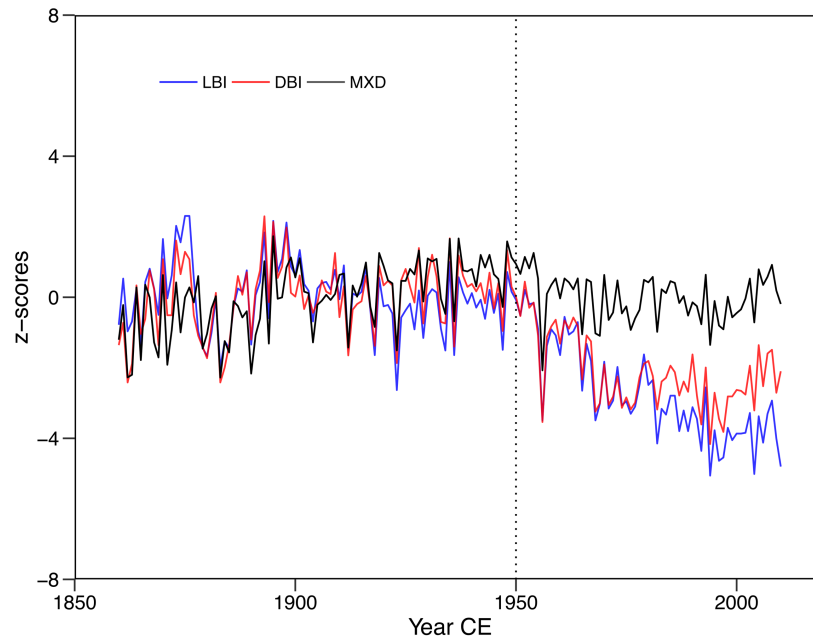

**Figure S8.** Averaged raw measurements of LBI, DBI, and MXD from five living trees at L20 (untreated with de-staining chemicals). Data are transformed to z-scores relative to the 1860–1950 time interval. Dotted vertical line denotes the approximate onset (1950) of BI divergence relative to MXD data.

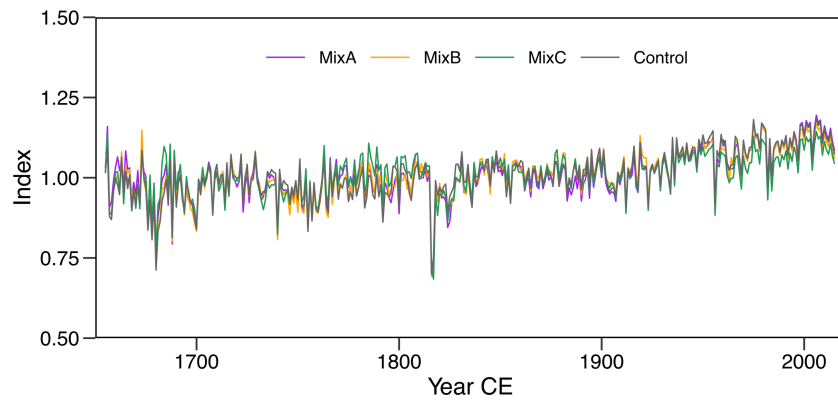

**Figure S9.** MXD regional chronologies for the MixA, MixB, MixC, and Control treatments.

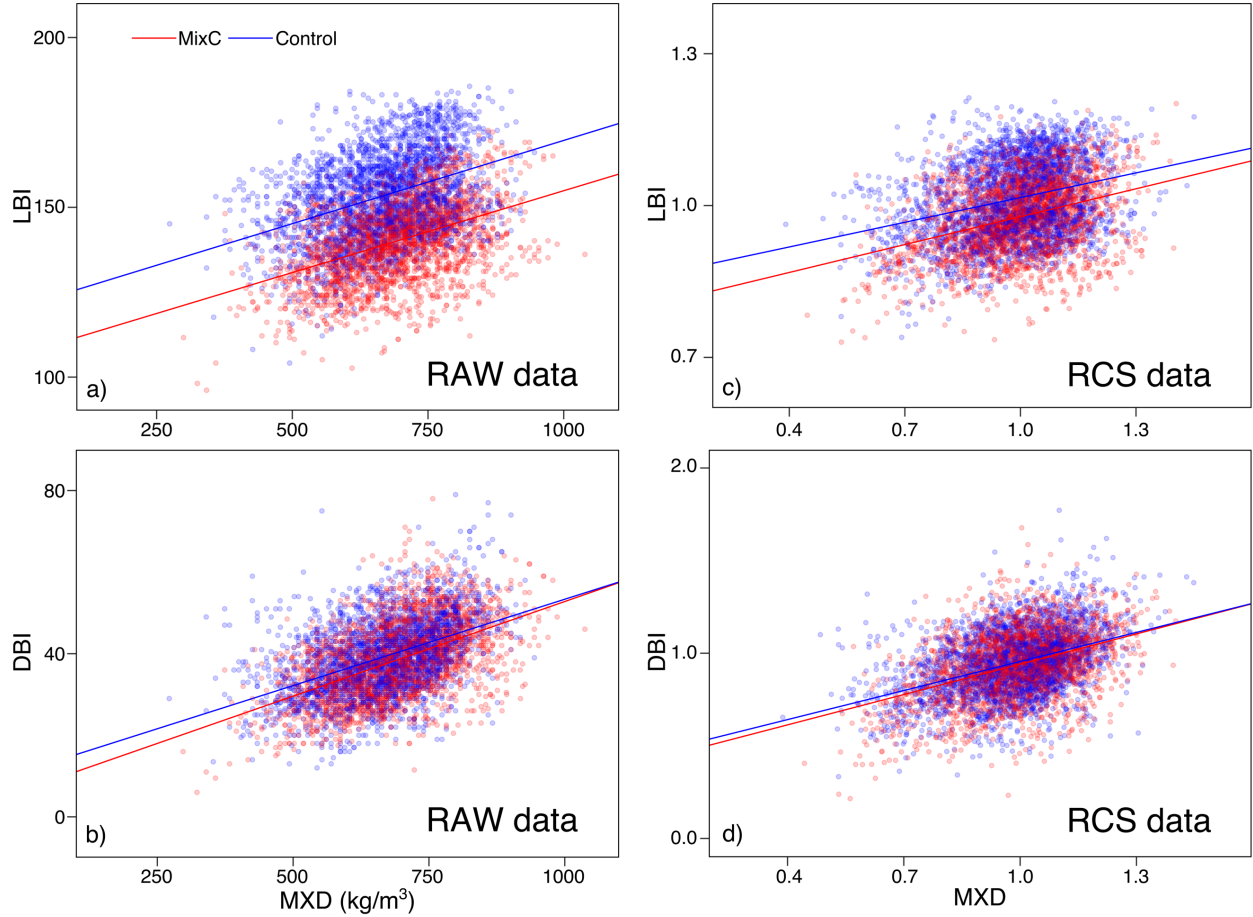

**Figure S10.** Comparisons of LBI (a, c) and DBI (b, d) against MXD data for the MixC treated and Control stained LSTs. Comparisons are based on raw data (left panel) and RCS standardized data (right panel). Straight lines are linear regressions between BI and MXD data.

**Table S1.** Statistics of calibration (1901–1960) and verification (1960–2015) for LBI, DBI and MXD against the May–August temperature target. All statistics in the table are significant  $p < 0.05$ , RE and CE  $> 0$ .

|                    | LBI vs Temp | DBI vs Temp | MXD vs Temp |
|--------------------|-------------|-------------|-------------|
| Full $r^2$         | 0.431       | 0.358       | 0.528       |
| Calibration $r^2$  | 0.427       | 0.429       | 0.464       |
| Verification $r^2$ | 0.246       | 0.088       | 0.443       |
| Verification RE    | 0.529       | 0.425       | 0.632       |
| Verification CE    | 0.216       | 0.043       | 0.388       |
| RMSE               | 0.112       | 0.096       | 0.144       |
